# Supplementary material for: Antibiotic pretreatment minimizes dietary effects on reconstructure of rumen fluid and mucosal microbiota in goats
Source: PubMed Central journal article supplement (PMC5822325; doi:10.1002/mbo3.537), 2017-10-05
Supplement: MBO3-7-na-s001.pdf [file MBO3-7-na-s001.pdf]

Fig. S1. (A) OTU-level comparison of diet-induced alterations between antibiotic-pretreated rumen fluid (RF) microbiota and indigenous RF microbiota. (B) OTU-level comparison of diet-induced alterations between antibiotic-pretreated rumen mucosal (RM) microbiota and indigenous RM microbiota.

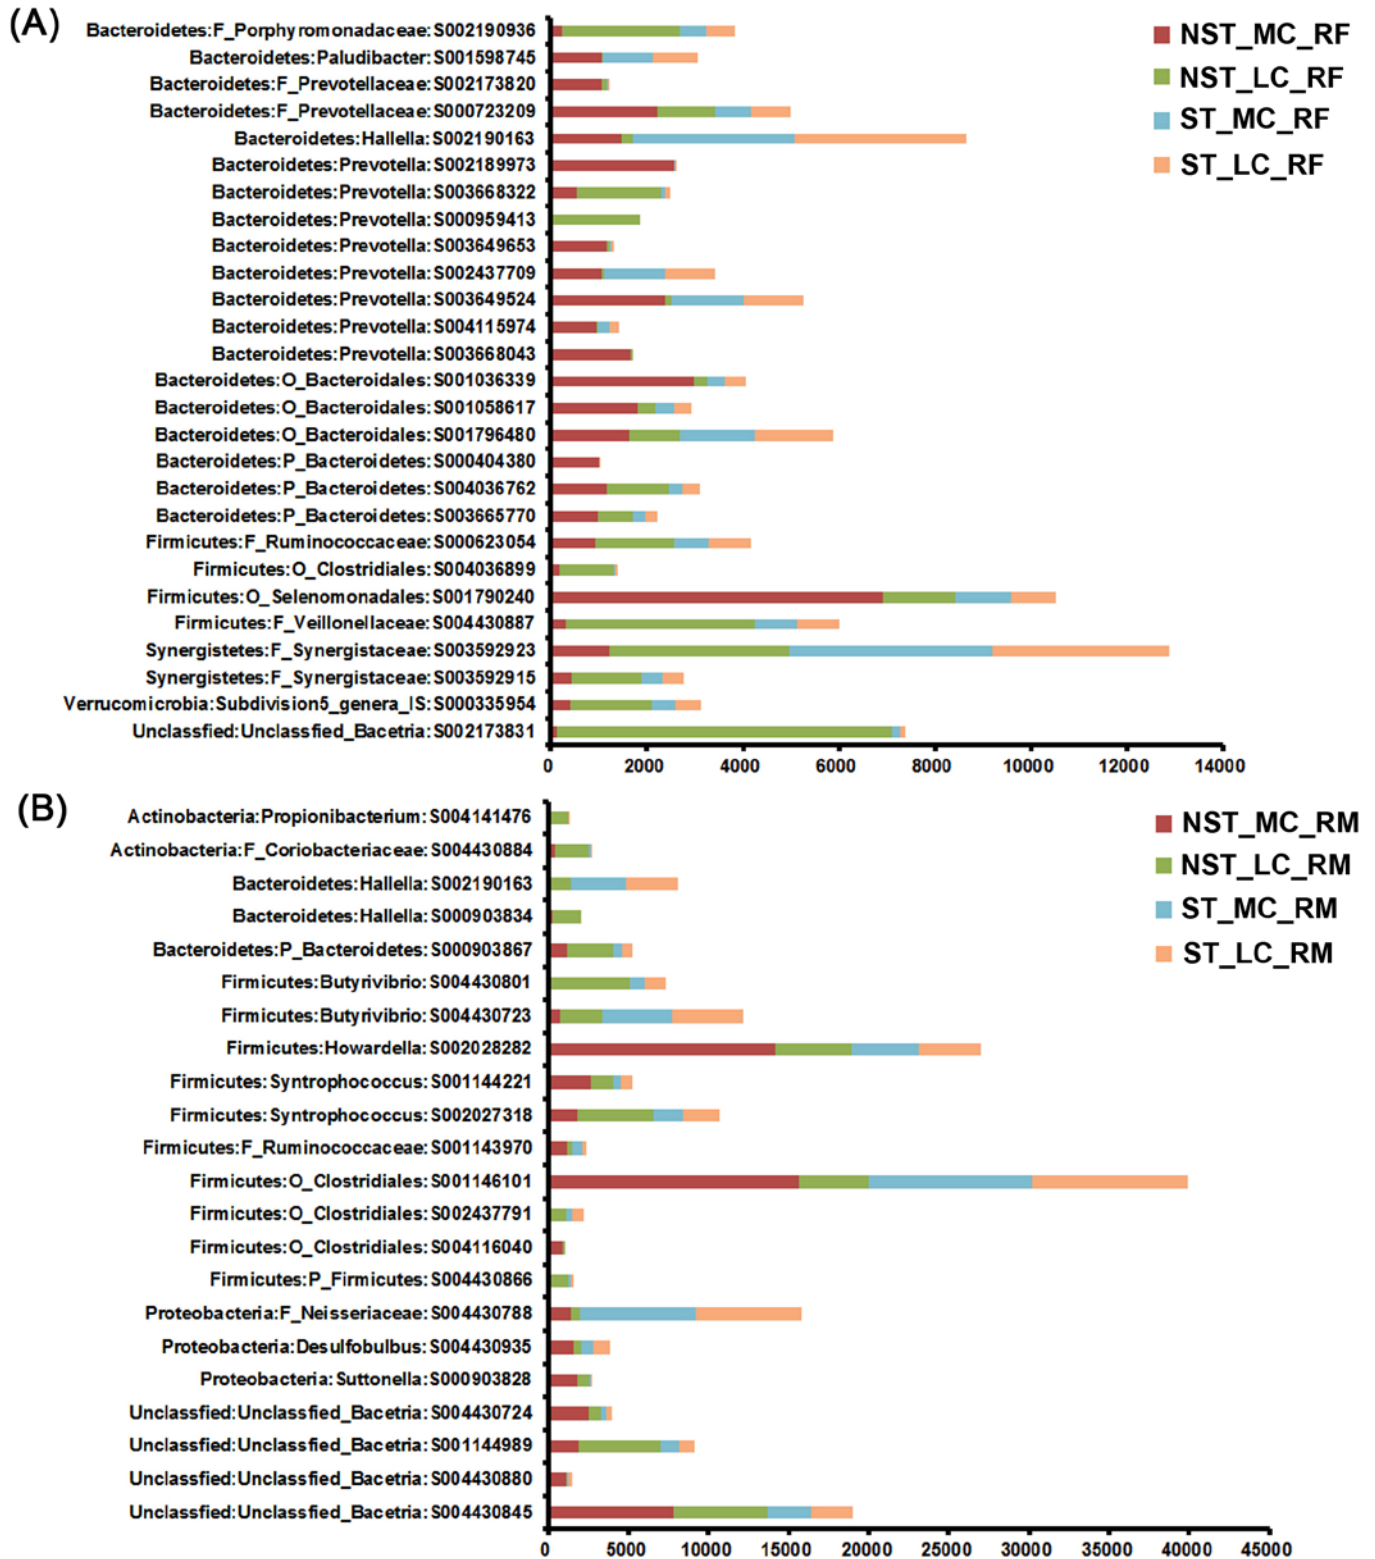

Fig. S2. Community diversity estimated by using Shannon and Simpson indices

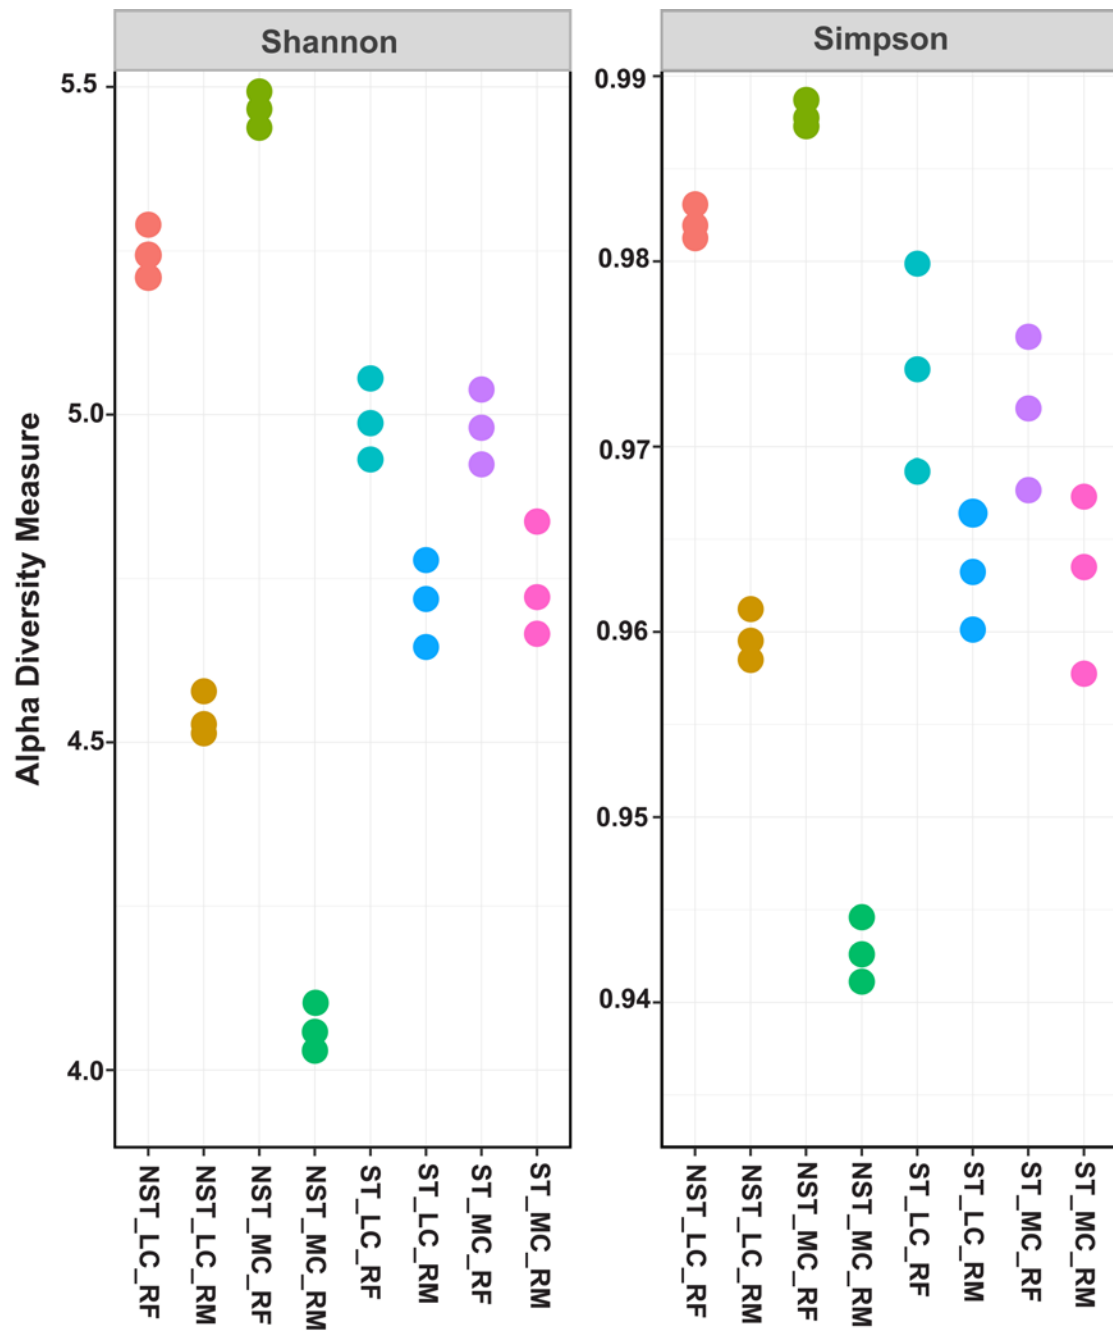

Fig. S3. Richness of rumen microbiota estimated by using rarefaction curves.

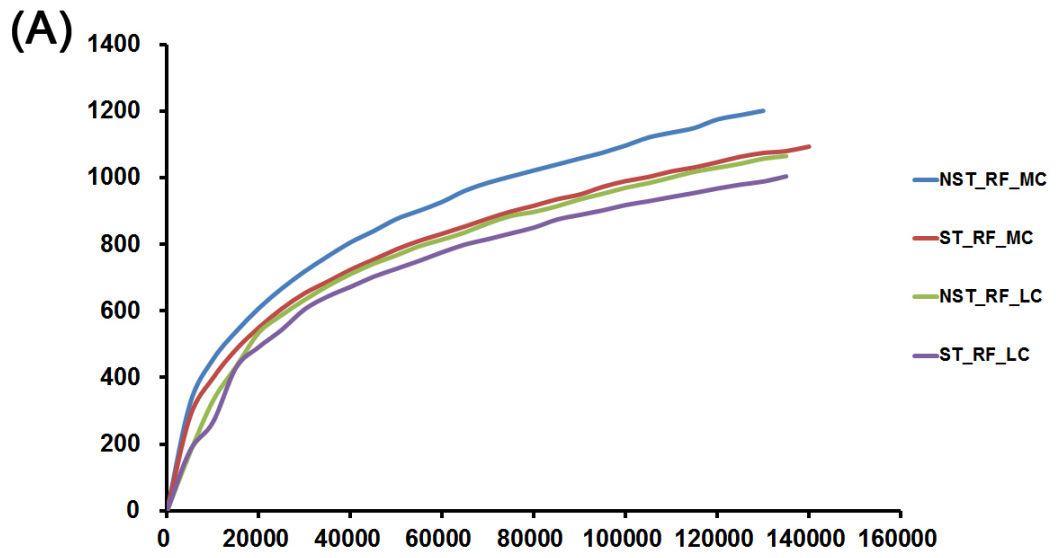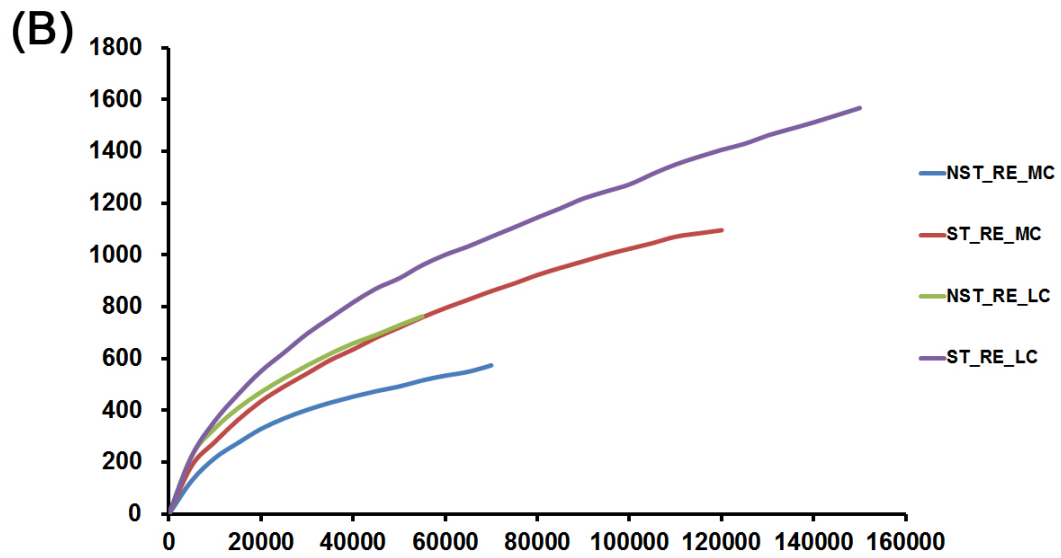

Table S1. Compositions of rumen fluid and mucosal microbiota (mean percentage  $\pm$  SE; N = 3).

| Item | Genus               | NST_MC_RM      | NST_MC_RF    | NST_LC_RM      | NST_LC_RF     | ST_MC_RM      | ST_MC_RF      | ST_LC_RM        | ST_LC_RF       |
|------|---------------------|----------------|--------------|----------------|---------------|---------------|---------------|-----------------|----------------|
| 1    | Acetivibrio         | 98 $\pm$ 41    | 304 $\pm$ 18 | 10 $\pm$ 10    | 254 $\pm$ 16  | 104 $\pm$ 20  | 251 $\pm$ 56  | 148 $\pm$ 44    | 267 $\pm$ 60   |
| 2    | Acidiferrobacter    | 0 $\pm$ 0      | 0 $\pm$ 0    | 0 $\pm$ 0      | 0 $\pm$ 0     | 18 $\pm$ 12   | 0 $\pm$ 0     | 13 $\pm$ 7      | 0 $\pm$ 0      |
| 3    | Acidovorax          | 0 $\pm$ 0      | 0 $\pm$ 0    | 0 $\pm$ 0      | 0 $\pm$ 0     | 8 $\pm$ 5     | 0 $\pm$ 0     | 37 $\pm$ 26     | 1 $\pm$ 1      |
| 4    | Acinetobacter       | 115 $\pm$ 83   | 0 $\pm$ 0    | 1316 $\pm$ 675 | 0 $\pm$ 0     | 424 $\pm$ 53  | 30 $\pm$ 7    | 1497 $\pm$ 1114 | 43 $\pm$ 38    |
| 5    | Actinomycetospora   | 14 $\pm$ 14    | 0 $\pm$ 0    | 0 $\pm$ 0      | 0 $\pm$ 0     | 0 $\pm$ 0     | 0 $\pm$ 0     | 0 $\pm$ 0       | 0 $\pm$ 0      |
| 6    | Akkermansia         | 0 $\pm$ 0      | 17 $\pm$ 4   | 0 $\pm$ 0      | 0 $\pm$ 0     | 1 $\pm$ 1     | 0 $\pm$ 0     | 0 $\pm$ 0       | 0 $\pm$ 0      |
| 7    | Allofustis          | 0 $\pm$ 0      | 0 $\pm$ 0    | 0 $\pm$ 0      | 0 $\pm$ 0     | 1 $\pm$ 1     | 1 $\pm$ 1     | 6 $\pm$ 5       | 4 $\pm$ 0      |
| 8    | Alloprevotella      | 14 $\pm$ 14    | 64 $\pm$ 3   | 175 $\pm$ 104  | 0 $\pm$ 0     | 312 $\pm$ 152 | 11 $\pm$ 8    | 194 $\pm$ 187   | 58 $\pm$ 46    |
| 9    | Anaerofustis        | 43 $\pm$ 43    | 2 $\pm$ 2    | 0 $\pm$ 0      | 18 $\pm$ 3    | 19 $\pm$ 5    | 12 $\pm$ 5    | 14 $\pm$ 7      | 6 $\pm$ 3      |
| 10   | Anaeroplasma        | 45 $\pm$ 35    | 292 $\pm$ 19 | 105 $\pm$ 62   | 1037 $\pm$ 77 | 401 $\pm$ 132 | 541 $\pm$ 319 | 239 $\pm$ 127   | 592 $\pm$ 208  |
| 11   | Anaerorhabdus       | 11 $\pm$ 11    | 3 $\pm$ 2    | 55 $\pm$ 55    | 8 $\pm$ 1     | 4 $\pm$ 4     | 1 $\pm$ 1     | 0 $\pm$ 0       | 4 $\pm$ 2      |
| 12   | Anaerovibrio        | 0 $\pm$ 0      | 31 $\pm$ 8   | 0 $\pm$ 0      | 49 $\pm$ 4    | 0 $\pm$ 0     | 24 $\pm$ 10   | 0 $\pm$ 0       | 21 $\pm$ 2     |
| 13   | Anaerovorax         | 2031 $\pm$ 204 | 887 $\pm$ 47 | 1791 $\pm$ 106 | 708 $\pm$ 45  | 578 $\pm$ 90  | 512 $\pm$ 21  | 488 $\pm$ 115   | 488 $\pm$ 39   |
| 14   | Armatimonadetes_gp2 | 7 $\pm$ 7      | 94 $\pm$ 11  | 10 $\pm$ 10    | 12 $\pm$ 9    | 6 $\pm$ 3     | 58 $\pm$ 23   | 1 $\pm$ 1       | 37 $\pm$ 27    |
| 15   | Armatimonadetes_gp5 | 54 $\pm$ 54    | 0 $\pm$ 0    | 17 $\pm$ 17    | 0 $\pm$ 0     | 6 $\pm$ 6     | 0 $\pm$ 0     | 0 $\pm$ 0       | 0 $\pm$ 0      |
| 16   | Atopobium           | 699 $\pm$ 61   | 79 $\pm$ 1   | 747 $\pm$ 111  | 48 $\pm$ 13   | 375 $\pm$ 49  | 40 $\pm$ 13   | 419 $\pm$ 103   | 43 $\pm$ 18    |
| 17   | Azomonas            | 0 $\pm$ 0      | 0 $\pm$ 0    | 0 $\pm$ 0      | 0 $\pm$ 0     | 13 $\pm$ 5    | 0 $\pm$ 0     | 25 $\pm$ 12     | 0 $\pm$ 0      |
| 18   | Bacillus            | 0 $\pm$ 0      | 0 $\pm$ 0    | 0 $\pm$ 0      | 0 $\pm$ 0     | 53 $\pm$ 12   | 0 $\pm$ 0     | 104 $\pm$ 67    | 5 $\pm$ 5      |
| 19   | Barnesiella         | 172 $\pm$ 25   | 454 $\pm$ 39 | 155 $\pm$ 82   | 373 $\pm$ 25  | 447 $\pm$ 153 | 734 $\pm$ 627 | 260 $\pm$ 184   | 1539 $\pm$ 703 |
| 20   | Bdellovibrio        | 11 $\pm$ 11    | 0 $\pm$ 0    | 0 $\pm$ 0      | 0 $\pm$ 0     | 0 $\pm$ 0     | 0 $\pm$ 0     | 7 $\pm$ 7       | 0 $\pm$ 0      |

| Item | Genus                    | NST_MC_RM | NST_MC_RF | NST_LC_RM | NST_LC_RF | ST_MC_RM  | ST_MC_RF | ST_LC_RM  | ST_LC_RF |
|------|--------------------------|-----------|-----------|-----------|-----------|-----------|----------|-----------|----------|
| 21   | Bilophila                | 0±0       | 23±5      | 0±0       | 0±0       | 0±0       | 0±0      | 0±0       | 0±0      |
| 22   | Blastobacter             | 0±0       | 0±0       | 0±0       | 0±0       | 0±0       | 0±0      | 6±4       | 0±0      |
| 23   | Blautia                  | 49±12     | 6±6       | 9±9       | 19±3      | 48±16     | 31±5     | 9±4       | 52±10    |
| 24   | Buttiauxella             | 0±0       | 0±0       | 22±22     | 0±0       | 2±2       | 0±0      | 0±0       | 0±0      |
| 25   | Butyricoccus             | 0±0       | 0±0       | 0±0       | 0±0       | 16±5      | 0±0      | 35±15     | 3±3      |
| 26   | Butyrivibrio             | 1992±19   | 697±33    | 9202±659  | 786±30    | 5542±4637 | 303±53   | 8844±4291 | 295±52   |
| 27   | Candidatus_Endomicrobium | 5±5       | 26±7      | 0±0       | 36±3      | 8±8       | 51±9     | 9±8       | 22±11    |
| 28   | Chelatococcus            | 82±49     | 2±2       | 170±78    | 0±0       | 0±0       | 0±0      | 0±0       | 0±0      |
| 29   | Clostridium_IV           | 108±56    | 214±13    | 138±77    | 838±57    | 218±22    | 580±56   | 242±43    | 780±46   |
| 30   | Clostridium_XIVa         | 64±40     | 69±6      | 61±35     | 103±23    | 103±19    | 92±34    | 174±96    | 142±36   |
| 31   | Clostridium_XIVb         | 369±52    | 4±2       | 188±66    | 0±0       | 267±215   | 2±1      | 497±250   | 2±2      |
| 32   | Clostridium_XVIII        | 0±0       | 0±0       | 0±0       | 0±0       | 11±7      | 0±0      | 16±11     | 0±0      |
| 33   | Coprococcus              | 90±30     | 44±8      | 0±0       | 39±5      | 48±16     | 21±14    | 18±15     | 31±17    |
| 34   | Desulfobulbus            | 3138±257  | 19±10     | 1635±48   | 16±5      | 1911±725  | 54±19    | 1932±669  | 53±17    |
| 35   | Desulfovibrio            | 0±0       | 93±16     | 0±0       | 79±4      | 11±6      | 64±25    | 11±6      | 108±34   |
| 36   | Diplorickettsia          | 30±30     | 0±0       | 49±49     | 0±0       | 0±0       | 0±0      | 0±0       | 0±0      |
| 37   | Ensifer                  | 101±12    | 0±0       | 316±148   | 2±2       | 48±11     | 1±1      | 50±7      | 8±8      |
| 38   | Enterobacter             | 0±0       | 0±0       | 0±0       | 0±0       | 0±0       | 0±0      | 9±9       | 0±0      |
| 39   | Enterorhabdus            | 102±17    | 13±4      | 31±31     | 17±6      | 15±5      | 14±8     | 10±5      | 8±2      |
| 40   | Escherichia              | 2±2       | 0±0       | 0±0       | 0±0       | 213±27    | 0±0      | 548±346   | 16±11    |
| 41   | Eubacterium              | 430±14    | 6±1       | 249±125   | 0±0       | 121±115   | 4±2      | 221±111   | 4±2      |
| 42   | Fibrobacter              | 647±69    | 1041±62   | 935±147   | 381±40    | 275±20    | 268±131  | 236±79    | 378±137  |

| Item | Genus               | NST_MC_RM | NST_MC_RF | NST_LC_RM | NST_LC_RF | ST_MC_RM  | ST_MC_RF  | ST_LC_RM  | ST_LC_RF  |
|------|---------------------|-----------|-----------|-----------|-----------|-----------|-----------|-----------|-----------|
| 43   | Filifactor          | 0±0       | 0±0       | 0±0       | 0±0       | 43±18     | 22±10     | 44±14     | 26±9      |
| 44   | Flavobacterium      | 0±0       | 0±0       | 0±0       | 0±0       | 423±125   | 13±1      | 1416±887  | 34±29     |
| 45   | Flavonifractor      | 5±5       | 0±0       | 0±0       | 2±2       | 15±5      | 0±0       | 24±20     | 6±4       |
| 46   | Gemmatimonas        | 0±0       | 0±0       | 0±0       | 0±0       | 24±12     | 0±0       | 14±8      | 0±0       |
| 47   | Gp6                 | 0±0       | 0±0       | 0±0       | 0±0       | 13±13     | 0±0       | 0±0       | 0±0       |
| 48   | Hallella            | 280±64    | 1495±16   | 3378±280  | 244±17    | 4415±1987 | 2920±1700 | 2239±1886 | 5484±2329 |
| 49   | Helcococcus         | 0±0       | 0±0       | 0±0       | 0±0       | 7±4       | 0±0       | 7±4       | 1±1       |
| 50   | Howardella          | 14371±466 | 30±2      | 4854±263  | 36±6      | 4321±129  | 34±12     | 3522±559  | 294±280   |
| 51   | Hymenobacter        | 0±0       | 0±0       | 0±0       | 0±0       | 0±0       | 0±0       | 5±5       | 0±0       |
| 52   | Lachnoanaerobaculum | 5±5       | 3±3       | 0±0       | 9±6       | 4±4       | 13±4      | 11±8      | 18±5      |
| 53   | Lachnospiracea_IS   | 139±16    | 1184±47   | 83±44     | 822±18    | 124±21    | 1012±556  | 124±32    | 1647±581  |
| 54   | Leucothrix          | 0±0       | 0±0       | 0±0       | 0±0       | 12±6      | 0±0       | 5±3       | 0±0       |
| 55   | Microbacterium      | 49±1      | 1±1       | 82±47     | 0±0       | 4±2       | 0±0       | 3±2       | 1±1       |
| 56   | Mogibacterium       | 46±21     | 19±7      | 14±8      | 12±9      | 8±5       | 7±5       | 14±12     | 5±3       |
| 57   | Moryella            | 31±31     | 28±2      | 10±10     | 63±10     | 31±15     | 14±5      | 38±23     | 21±9      |
| 58   | Murdochiella        | 0±0       | 0±0       | 0±0       | 0±0       | 16±11     | 1±1       | 4±4       | 0±0       |
| 59   | Nocardioides        | 6±3       | 0±0       | 118±61    | 0±0       | 0±0       | 0±0       | 0±0       | 0±0       |
| 60   | Novosphingobium     | 11±11     | 0±0       | 0±0       | 0±0       | 4±4       | 0±0       | 1±1       | 0±0       |
| 61   | Ochrobactrum        | 805±70    | 2±2       | 2633±929  | 3±3       | 176±49    | 0±0       | 116±9     | 22±20     |
| 62   | Odoribacter         | 0±0       | 0±0       | 0±0       | 0±0       | 11±6      | 0±0       | 14±12     | 5±3       |
| 63   | Ohtaekwangia        | 0±0       | 0±0       | 0±0       | 0±0       | 10±5      | 0±0       | 6±6       | 0±0       |
| 64   | Oligosphaera        | 34±29     | 321±22    | 38±38     | 167±22    | 27±16     | 416±153   | 31±15     | 292±154   |

| Item | Genus                | NST_MC_RM | NST_MC_RF | NST_LC_RM | NST_LC_RF | ST_MC_RM  | ST_MC_RF   | ST_LC_RM  | ST_LC_RF   |
|------|----------------------|-----------|-----------|-----------|-----------|-----------|------------|-----------|------------|
| 65   | Olsenella            | 138±52    | 17±7      | 3±3       | 50±3      | 35±16     | 23±9       | 33±13     | 11±3       |
| 66   | Opitutus             | 19±19     | 0±0       | 0±0       | 0±0       | 0±0       | 0±0        | 0±0       | 0±0        |
| 67   | Oscillibacter        | 70±35     | 1490±51   | 102±62    | 1292±10   | 72±7      | 1373±176   | 112±32    | 1218±159   |
| 68   | Paludibacter         | 18±9      | 1520±57   | 31±31     | 181±45    | 80±42     | 1016±163   | 156±72    | 741±157    |
| 69   | Paraprevotella       | 163±76    | 1108±22   | 33±21     | 569±40    | 107±58    | 748±75     | 125±36    | 711±141    |
| 70   | Patulibacter         | 16±16     | 0±0       | 0±0       | 0±0       | 0±0       | 0±0        | 0±0       | 0±0        |
| 71   | Pedobacter           | 0±0       | 2±2       | 0±0       | 0±0       | 2093±410  | 43±12      | 4899±3486 | 122±111    |
| 72   | Pelomonas            | 0±0       | 0±0       | 0±0       | 0±0       | 21±9      | 0±0        | 13±10     | 0±0        |
| 73   | Peptococcus          | 0±0       | 0±0       | 0±0       | 0±0       | 6±6       | 0±0        | 6±6       | 0±0        |
| 74   | Phaselicystis        | 0±0       | 0±0       | 0±0       | 0±0       | 0±0       | 0±0        | 4±4       | 0±0        |
| 75   | Phycisphaera         | 0±0       | 0±0       | 0±0       | 0±0       | 0±0       | 0±0        | 8±6       | 0±0        |
| 76   | Phyllobacterium      | 0±0       | 0±0       | 36±31     | 0±0       | 0±0       | 0±0        | 0±0       | 0±0        |
| 77   | Prevotella           | 2610±137  | 17808±679 | 1236±154  | 10391±31  | 2536±1262 | 22127±8260 | 3385±1207 | 12328±7632 |
| 78   | Propionibacterium    | 476±159   | 9±5       | 2494±465  | 28±11     | 78±28     | 0±0        | 50±9      | 3±1        |
| 79   | Pseudobutyrvibrio    | 0±0       | 51±9      | 0±0       | 19±7      | 0±0       | 0±0        | 0±0       | 0±0        |
| 80   | Pseudochrobactrum    | 32±13     | 0±0       | 108±49    | 0±0       | 4±4       | 0±0        | 3±0       | 0±0        |
| 81   | Pseudoflavonifractor | 0±0       | 0±0       | 0±0       | 0±0       | 0±0       | 0±0        | 33±31     | 0±0        |
| 82   | Pseudomonas          | 20±12     | 0±0       | 79±7      | 0±0       | 4006±657  | 85±19      | 8353±5585 | 344±298    |
| 83   | Pseudonocardia       | 24±12     | 0±0       | 27±27     | 0±0       | 0±0       | 0±0        | 0±0       | 0±0        |
| 84   | Pseudoramibacter     | 0±0       | 4±4       | 0±0       | 0±0       | 0±0       | 2±2        | 13±2      | 0±0        |
| 85   | Rhizobium            | 143±27    | 1±1       | 480±109   | 8±4       | 270±79    | 14±3       | 687±488   | 24±20      |
| 86   | Rhodoplanes          | 0±0       | 0±0       | 0±0       | 0±0       | 8±8       | 0±0        | 0±0       | 0±0        |

| Item | Genus                      | NST_MC_RM | NST_MC_RF | NST_LC_RM | NST_LC_RF | ST_MC_RM | ST_MC_RF | ST_LC_RM | ST_LC_RF |
|------|----------------------------|-----------|-----------|-----------|-----------|----------|----------|----------|----------|
| 87   | Rhodovulum                 | 14±14     | 0±0       | 0±0       | 0±0       | 0±0      | 0±0      | 0±0      | 0±0      |
| 88   | Roseburia                  | 0±0       | 104±13    | 27±27     | 69±8      | 2±2      | 5±1      | 0±0      | 4±2      |
| 89   | Roseomonas                 | 0±0       | 0±0       | 0±0       | 0±0       | 5±4      | 0±0      | 5±5      | 0±0      |
| 90   | Ruminobacter               | 0±0       | 2±2       | 0±0       | 0±0       | 0±0      | 22±11    | 8±6      | 10±10    |
| 91   | Ruminococcus               | 279±63    | 486±41    | 229±38    | 522±49    | 154±8    | 534±79   | 145±40   | 667±59   |
| 92   | Ruminococcus2              | 0±0       | 0±0       | 0±0       | 0±0       | 0±0      | 0±0      | 5±5      | 0±0      |
| 93   | Saccharibacteria_genera_IS | 63±11     | 828±34    | 219±46    | 775±51    | 422±352  | 471±23   | 580±280  | 416±33   |
| 94   | Saccharofermentans         | 63±9      | 250±32    | 17±17     | 121±21    | 38±12    | 44±20    | 44±14    | 52±15    |
| 95   | Schwartzia                 | 19±10     | 319±15    | 27±27     | 300±35    | 18±18    | 331±117  | 42±15    | 265±155  |
| 96   | Selenomonas                | 5±5       | 5±3       | 0±0       | 6±3       | 0±0      | 11±8     | 2±2      | 12±5     |
| 97   | Serratia                   | 0±0       | 0±0       | 0±0       | 0±0       | 14±5     | 0±0      | 48±26    | 9±9      |
| 98   | Slackia                    | 6±3       | 376±16    | 77±43     | 205±21    | 4±4      | 83±37    | 12±5     | 58±19    |
| 99   | Solirubrobacter            | 33±19     | 0±0       | 132±132   | 0±0       | 0±0      | 0±0      | 0±0      | 0±0      |
| 100  | Sphaerobacter              | 64±47     | 0±0       | 571±217   | 0±0       | 45±22    | 0±0      | 17±13    | 0±0      |
| 101  | Sphaerochaeta              | 22±12     | 38±2      | 11±11     | 298±14    | 6±6      | 285±146  | 28±21    | 148±142  |
| 102  | Sphingomonas               | 85±44     | 0±0       | 208±51    | 0±0       | 0±0      | 0±0      | 0±0      | 0±0      |
| 103  | Spirosoma                  | 14±14     | 0±0       | 16±16     | 0±0       | 0±0      | 0±0      | 3±3      | 0±0      |
| 104  | Sporobacter                | 52±12     | 154±2     | 20±20     | 56±4      | 96±34    | 128±32   | 79±41    | 74±37    |
| 105  | Staphylococcus             | 103±54    | 0±0       | 631±207   | 0±0       | 6±6      | 0±0      | 4±3      | 0±0      |
| 106  | Streptococcus              | 13±13     | 6±3       | 253±182   | 12±12     | 0±0      | 0±0      | 0±0      | 1±1      |
| 107  | Subdivision3_genera_IS     | 0±0       | 0±0       | 0±0       | 0±0       | 2±2      | 0±0      | 8±4      | 0±0      |
| 108  | Subdivision5_genera_IS     | 276±17    | 5682±136  | 245±168   | 6470±95   | 256±20   | 7078±715 | 218±60   | 7571±490 |



| Item | Genus                 | NST_MC_RM | NST_MC_RF | NST_LC_RM | NST_LC_RF | ST_MC_RM  | ST_MC_RF | ST_LC_RM  | ST_LC_RF |
|------|-----------------------|-----------|-----------|-----------|-----------|-----------|----------|-----------|----------|
| 109  | Succiniclasticum      | 17±12     | 40±15     | 0±0       | 51±8      | 8±2       | 46±7     | 2±2       | 30±6     |
| 110  | Succinivibrio         | 6±3       | 3±2       | 0±0       | 8±1       | 1±1       | 12±10    | 0±0       | 11±6     |
| 111  | Suttonella            | 1829±124  | 21±11     | 762±50    | 7±4       | 44±22     | 1±1      | 35±34     | 22±22    |
| 112  | Syntrophococcus       | 5391±192  | 231±15    | 6782±273  | 141±16    | 5544±3884 | 174±55   | 8057±3644 | 236±94   |
| 113  | Thermus               | 27±27     | 0±0       | 20±10     | 0±0       | 0±0       | 0±0      | 0±0       | 0±0      |
| 114  | Treponema             | 451±80    | 864±36    | 243±86    | 575±17    | 298±9     | 428±150  | 208±59    | 492±143  |
| 115  | Vampirovibrio         | 146±25    | 1825±92   | 332±68    | 1830±72   | 154±38    | 2762±357 | 117±8     | 2497±234 |
| 116  | Variovorax            | 11±11     | 0±0       | 49±49     | 0±0       | 0±0       | 0±0      | 0±0       | 0±0      |
| 117  | Victivallis           | 56±33     | 953±21    | 0±0       | 316±11    | 2±2       | 595±218  | 17±15     | 462±270  |
| 118  | C_Acidobacteria_Gp4   | 0±0       | 0±0       | 0±0       | 0±0       | 8±8       | 0±0      | 0±0       | 0±0      |
| 119  | C_Actinobacteria      | 11±11     | 0±0       | 0±0       | 0±0       | 0±0       | 0±0      | 0±0       | 0±0      |
| 120  | C_Alphaproteobacteria | 275±76    | 1544±78   | 442±148   | 363±18    | 132±80    | 1512±143 | 195±74    | 1091±115 |
| 121  | C_Betaproteobacteria  | 0±0       | 8±3       | 24±24     | 9±5       | 80±24     | 16±11    | 35±28     | 15±6     |
| 122  | C_Clostridia          | 15±12     | 57±8      | 43±35     | 136±13    | 20±4      | 71±5     | 12±5      | 75±13    |
| 123  | C_Deltaproteobacteria | 48±30     | 452±22    | 217±57    | 126±19    | 111±25    | 225±65   | 129±16    | 306±84   |
| 124  | C_Gammaproteobacteria | 0±0       | 0±0       | 0±0       | 0±0       | 8±8       | 0±0      | 0±0       | 0±0      |
| 125  | F_Acetobacteraceae    | 0±0       | 0±0       | 0±0       | 0±0       | 171±83    | 0±0      | 47±25     | 0±0      |
| 126  | F_Anaerolineaceae     | 266±44    | 48±15     | 113±66    | 209±24    | 24±24     | 152±59   | 40±4      | 85±33    |
| 127  | F_Aurantimonadaceae   | 22±20     | 0±0       | 29±11     | 0±0       | 0±0       | 0±0      | 1±1       | 0±0      |
| 128  | F_Bifidobacteriaceae  | 0±0       | 0±0       | 0±0       | 0±0       | 4±4       | 2±2      | 2±2       | 0±0      |
| 129  | F_Bradyrhizobiaceae   | 0±0       | 0±0       | 0±0       | 0±0       | 18±12     | 0±0      | 3±2       | 0±0      |
| 130  | F_Burkholderiales_IS  | 0±0       | 0±0       | 0±0       | 0±0       | 12±9      | 0±0      | 0±0       | 0±0      |

| Item | Genus                   | NST_MC_RM | NST_MC_RF | NST_LC_RM | NST_LC_RF | ST_MC_RM  | ST_MC_RF  | ST_LC_RM  | ST_LC_RF  |
|------|-------------------------|-----------|-----------|-----------|-----------|-----------|-----------|-----------|-----------|
| 131  | F_Chloroflexaceae       | 0±0       | 0±0       | 0±0       | 0±0       | 33±17     | 0±0       | 18±9      | 0±0       |
| 132  | F_Clostridiales_IS_XIII | 431±70    | 0±0       | 0±0       | 2±2       | 68±35     | 4±2       | 31±31     | 10±10     |
| 133  | F_Comamonadaceae        | 10±3      | 0±0       | 22±6      | 0±0       | 5±4       | 0±0       | 11±4      | 0±0       |
| 134  | F_Coriobacteriaceae     | 580±44    | 486±13    | 2074±283  | 546±29    | 239±10    | 269±113   | 161±30    | 179±70    |
| 135  | F_Desulfovibrionaceae   | 186±25    | 174±29    | 99±80     | 432±12    | 89±13     | 219±122   | 69±10     | 293±104   |
| 136  | F_Enterobacteriaceae    | 3538±317  | 307±26    | 4616±494  | 155±28    | 5780±1898 | 232±89    | 3792±2335 | 651±374   |
| 137  | F_Erysipelotrichaceae   | 230±23    | 155±14    | 67±43     | 1039±45   | 55±12     | 156±21    | 47±18     | 120±18    |
| 138  | F_Lachnospiraceae       | 7261±338  | 3487±49   | 8362±285  | 5901±54   | 4787±1863 | 3424±486  | 6246±2081 | 3700±403  |
| 139  | F_Microbacteriaceae     | 0±0       | 0±0       | 0±0       | 0±0       | 10±10     | 0±0       | 0±0       | 0±0       |
| 140  | F_Mycoplasmataceae      | 0±0       | 0±0       | 0±0       | 180±21    | 4±4       | 23±8      | 31±25     | 13±5      |
| 141  | F_Neisseriaceae         | 1705±94   | 8±1       | 505±86    | 15±4      | 9571±3811 | 77±34     | 5204±3680 | 1415±1349 |
| 142  | F_Peptostreptococcaceae | 0±0       | 15±5      | 0±0       | 0±0       | 0±0       | 48±25     | 9±5       | 17±13     |
| 143  | F_Phyllobacteriaceae    | 33±6      | 0±0       | 89±54     | 0±0       | 2±2       | 0±0       | 6±2       | 0±0       |
| 144  | F_Porphyrimonadaceae    | 774±115   | 1420±26   | 451±47    | 4812±164  | 734±47    | 2429±548  | 685±146   | 2957±590  |
| 145  | F_Prevotellaceae        | 815±120   | 4125±77   | 904±108   | 2777±86   | 5326±2388 | 1578±508  | 2696±2327 | 2171±248  |
| 146  | F_Pseudomonadaceae      | 0±0       | 0±0       | 5±5       | 0±0       | 299±62    | 7±4       | 565±375   | 26±21     |
| 147  | F_Puniceicoccaceae      | 0±0       | 15±7      | 0±0       | 4±4       | 0±0       | 6±4       | 2±1       | 6±4       |
| 148  | F_Rhodocyclaceae        | 0±0       | 0±0       | 0±0       | 0±0       | 8±8       | 0±0       | 2±2       | 0±0       |
| 149  | F_Rhodospirillaceae     | 16±16     | 0±0       | 0±0       | 0±0       | 20±10     | 0±0       | 4±4       | 0±0       |
| 150  | F_Ruminococcaceae       | 3492±191  | 5405±116  | 3240±269  | 6342±170  | 4219±581  | 5657±129  | 3597±875  | 5320±237  |
| 151  | F_Sphingobacteriaceae   | 0±0       | 249±14    | 0±0       | 2±2       | 131±60    | 3318±3265 | 82±71     | 5029±2486 |
| 152  | F_Spirochaetaceae       | 542±33    | 192±30    | 99±75     | 254±18    | 99±56     | 143±15    | 175±76    | 134±28    |

| Item | Genus                    | NST_MC_RM | NST_MC_RF | NST_LC_RM  | NST_LC_RF | ST_MC_RM   | ST_MC_RF   | ST_LC_RM   | ST_LC_RF  |
|------|--------------------------|-----------|-----------|------------|-----------|------------|------------|------------|-----------|
| 153  | F_Sutterellaceae         | 0±0       | 41±6      | 0±0        | 0±0       | 2±2        | 17±6       | 0±0        | 7±4       |
| 154  | F_Synergistaceae         | 315±143   | 6914±41   | 511±49     | 10884±121 | 243±114    | 11135±3164 | 331±108    | 9811±3316 |
| 155  | F_Veillonellaceae        | 354±49    | 2956±93   | 134±42     | 6542±184  | 105±20     | 2344±283   | 142±34     | 2501±387  |
| 156  | O_Actinomycetales        | 0±0       | 0±0       | 0±0        | 0±0       | 18±18      | 0±0        | 15±11      | 0±0       |
| 157  | O_Bacillales             | 0±0       | 2±2       | 0±0        | 0±0       | 126±42     | 2±2        | 230±133    | 13±9      |
| 158  | O_Bacteroidales          | 2181±206  | 10318±164 | 4213±255   | 4161±68   | 2970±969   | 5546±609   | 3354±928   | 5021±341  |
| 159  | O_Burkholderiales        | 0±0       | 0±0       | 0±0        | 10±3      | 17±6       | 7±5        | 19±5       | 18±13     |
| 160  | O_Campylobacterales      | 119±30    | 98±12     | 105±15     | 116±10    | 121±31     | 195±23     | 110±15     | 199±20    |
| 161  | O_Chromatiales           | 14±14     | 2±2       | 53±48      | 0±0       | 0±0        | 0±0        | 0±0        | 0±0       |
| 162  | O_Clostridiales          | 19324±185 | 2602±46   | 8897±610   | 4770±79   | 16806±4252 | 2936±484   | 11461±4780 | 3239±466  |
| 163  | O_Desulfuromonadales     | 51±51     | 33±11     | 4±4        | 38±7      | 63±43      | 37±3       | 89±53      | 35±4      |
| 164  | O_Gammaproteobacteria_IS | 0±0       | 0±0       | 0±0        | 0±0       | 22±19      | 0±0        | 3±2        | 0±0       |
| 165  | O_Myxococcales           | 0±0       | 0±0       | 0±0        | 0±0       | 60±26      | 0±0        | 16±8       | 0±0       |
| 166  | O_Rhizobiales            | 7±7       | 0±0       | 27±27      | 0±0       | 17±6       | 0±0        | 9±6        | 0±0       |
| 167  | O_Rhodospirillales       | 0±0       | 0±0       | 214±214    | 0±0       | 40±23      | 0±0        | 11±6       | 0±0       |
| 168  | O_Selenomonadales        | 64±30     | 6853±59   | 223±37     | 1475±38   | 24±21      | 1173±462   | 43±24      | 724±410   |
| 169  | P_Bacteroidetes          | 2820±41   | 4677±108  | 4330±192   | 3010±39   | 2704±503   | 4171±2068  | 2121±554   | 5249±1871 |
| 170  | P_Chloroflexi            | 119±3     | 0±0       | 58±39      | 2±2       | 0±0        | 0±0        | 0±0        | 0±0       |
| 171  | P_Firmicutes             | 1023±148  | 2223±126  | 2497±342   | 3494±43   | 1459±58    | 2399±907   | 1342±169   | 2402±589  |
| 172  | P_Proteobacteria         | 7±5       | 32±9      | 0±0        | 14±7      | 16±7       | 60±29      | 5±1        | 77±19     |
| 173  | Unclassified_Bacetria    | 14250±536 | 3343±100  | 13217±1074 | 11668±133 | 5413±231   | 3822±1600  | 5259±681   | 5713±1891 |

Counts were normalized to the relative abundance of each sample and showed here in a scale of 1/100,000. F = family; O = order; C = class; P = phylum. IS: incertae

sedis

Table S2. Dietary compositions used in this study

| Ingredients    | MC (%) | LC (%) |
|----------------|--------|--------|
| Guinea grass   | 65     | 90     |
| Corn           | 25     | 0      |
| Soya bean meal | 8      | 8      |
| Additive       | 2      | 2      |

The additive was composed of calcium phosphate, limestone, trace mineral salt, and vitamin premix (vitamins A, D, and E).
